# Supplementary material
Source: PubMed Central journal article supplement (PMC5282953)
Supplement: 10.1194_M072058_jlr.M072058-1.pdf [file 10.1194_M072058_jlr.M072058-1.pdf]

| <b>Identification</b>              | <b>MRM transitions</b> | <b>Nitro fatty acid</b>                |
|------------------------------------|------------------------|----------------------------------------|
| NO <sub>2</sub> -SA                | 328.3/46               | Nitro-stearic acid                     |
| NO <sub>2</sub> -OA                | 326.3/46               | Nitro-oleic acid                       |
| NO <sub>2</sub> -dihydro-CLA       | 326.3/46               | Nitro-dihydro-conjugated linoleic acid |
| NO <sub>2</sub> -CLA               | 324.3/46               | Nitro-conjugated linoleic acid         |
| NO <sub>2</sub> -dihydro-LnA       | 324.3/46               | Nitro-dihydro-linolenic acid           |
| NO <sub>2</sub> -LnA               | 322.3/46               | Nitro-linolenic acid                   |
| Dinor NO <sub>2</sub> -SA          | 300.3/46               | Nitro-hexadecanoic acid                |
| Dinor NO <sub>2</sub> -OA          | 298.3/46               | Nitro-hexadecenoic acid                |
| Dinor NO <sub>2</sub> -dihydro-CLA | 298.3/46               | Nitro-dihydro-hexadecadienoic acid     |
| Dinor NO <sub>2</sub> -CLA         | 296.3/46               | Nitro-hexadecadienoic acid             |
| Dinor NO <sub>2</sub> -dihydro-LnA | 296.3/46               | Nitro-dihydro-hexadecatrienoic acid    |
| Dinor NO <sub>2</sub> -LnA         | 294.3/46               | Nitro-hexadecatrienoic acid            |
| Tetranor NO <sub>2</sub> -SA       | 272.3/46               | Nitro-tetradecanoic acid               |
| Tetranor NO <sub>2</sub> -OA       | 270.3/46               | Nitro-tetradecenoic acid               |
| Tetranor NO <sub>2</sub> -LnA      | 266.3/46               | Nitro-tetradecatrienoic acid           |
| Hexanor NO <sub>2</sub> -SA        | 244.3/46               | Nitro-dodecanoic acid                  |

**Supplemental Table S1.** Identification, MRM transitions and IUPAC nomenclature of nitro fatty acids in cellular media, adipocyte lipids and adipose tissue.

| Tissue type                  | Tissue/organ                 | $\mu\text{g equivalents } 10\text{-NO}_2\text{-OA/g}$ |                        |             |             |       |       |       |       |
|------------------------------|------------------------------|-------------------------------------------------------|------------------------|-------------|-------------|-------|-------|-------|-------|
|                              |                              | 1 h                                                   | 6 h                    | 24 h        | 48 h        | 72 h  | 120 h | 168 h | 336 h |
| Circulatory                  | Aorta                        | 3.94                                                  | <b>23.2</b>            | 2.57        | 1.35        | 3.20  | 0.580 | 0.375 | 0.776 |
|                              | Blood cells <sup>a</sup>     | 3.03                                                  | <b>4.18</b>            | 0.611       | 0.473       | 0.399 | 0.350 | 0.277 | 0.199 |
|                              | Plasma <sup>a</sup>          | 11.2                                                  | <b>19.6</b>            | 1.48        | 0.625       | 0.338 | 0.207 | 0.122 | BLQ   |
|                              | Whole-blood (cardiac)        | 9.27                                                  | <b>16.9</b>            | 1.05        | 0.680       | 0.746 | 0.318 | 0.220 | 0.235 |
|                              | Vena cava                    | 4.49                                                  | <b>13.5</b>            | 1.79        | 2.30        | 1.53  | 0.578 | 0.501 | 0.615 |
| Nervous                      | Brain                        | 0.358                                                 | <b>1.72</b>            | 0.215       | 0.373       | 0.270 | 0.202 | 0.163 | BLQ   |
|                              | Cerebellum                   | 0.320                                                 | <b>1.09</b>            | 0.232       | 0.407       | 0.276 | 0.204 | 0.160 | BLQ   |
|                              | Cerebrum                     | 0.292                                                 | <b>1.07</b>            | 0.193       | 0.354       | 0.268 | 0.204 | 0.165 | BLQ   |
|                              | Olfactory lobe               | 0.513                                                 | <b>1.43</b>            | 0.268       | 0.532       | 0.251 | 0.288 | 0.239 | BLQ   |
|                              | Spinal cord                  | 0.488                                                 | <b>1.77</b>            | 0.313       | 0.364       | 0.269 | 0.199 | 0.247 | 0.331 |
| Ocular                       | Uveal tract/retina           | 0.765                                                 | <b>2.89</b>            | 0.987       | 0.997       | 0.439 | 1.58  | 0.519 | 0.722 |
|                              | Eye (lens)                   | 0.146                                                 | <b>0.211</b>           | 0.205       | 0.136       | 0.114 | 0.132 | 0.201 | 0.146 |
| Visceral organs              | Kidney cortex                | 15.6                                                  | <b>28.0</b>            | 2.58        | 1.81        | 1.37  | 0.719 | 0.571 | 1.33  |
|                              | Kidney medulla               | 17.3                                                  | <b>28.8</b>            | 2.08        | 0.931       | 0.682 | 0.441 | 0.324 | 1.12  |
|                              | Liver                        | 16.7                                                  | <b>28.5</b>            | 4.48        | 1.97        | 1.19  | 0.741 | 0.509 | 0.299 |
|                              | Lungs                        | 4.16                                                  | <b>17.2</b>            | 1.52        | 1.62        | 0.783 | 0.450 | 0.351 | 0.275 |
|                              | Heart (myocardium)           | 11.3                                                  | <b>19.0</b>            | 1.77        | 1.71        | 1.19  | 1.20  | 0.710 | 2.21  |
|                              | Spleen                       | 5.44                                                  | <b>6.50</b>            | 1.41        | 1.12        | 1.89  | 0.327 | 0.278 | 0.387 |
| Glandular/secretory          | Adrenal cortex               | 6.13                                                  | <b>13.2</b>            | 6.57        | 3.52        | 4.67  | 2.53  | 1.77  | 3.24  |
|                              | Adrenal medulla              | 5.06                                                  | <b>8.91</b>            | 3.54        | 1.61        | 2.31  | 1.12  | 0.692 | 2.98  |
|                              | Exorbital lacrimal gland     | 1.82                                                  | <b>7.08</b>            | 1.33        | 1.02        | 1.11  | 0.545 | 0.328 | 0.363 |
|                              | Harderian gland              | 1.71                                                  | <b>12.0</b>            | 5.95        | 4.03        | 2.10  | 0.708 | 0.633 | 0.231 |
|                              | Intra-orbital lacrimal gland | 1.96                                                  | <b>6.86</b>            | 1.20        | 1.04        | 1.85  | 1.09  | 1.45  | 0.912 |
|                              | Mandibular lymph node        | 0.961                                                 | <b>7.84</b>            | 1.54        | 0.915       | 1.39  | 0.631 | 0.506 | 0.463 |
|                              | Mesenteric lymph nodes       | 3.91                                                  | <b>10.7</b>            | 2.81        | 3.25        | 3.08  | 0.603 | 0.998 | 0.677 |
|                              | Nasal turbinates             | 1.83                                                  | <b>3.23</b>            | 0.917       | 0.833       | 0.503 | 0.448 | 0.524 | 0.319 |
|                              | Pancreas                     | 5.55                                                  | <b>10.2</b>            | 1.72        | 1.23        | 1.13  | 0.368 | 0.327 | 0.760 |
|                              | Pineal gland                 | <b>1.09</b>                                           | NS                     | 0.655       | 0.775       | 0.773 | BLQ   | BLQ   | BLQ   |
|                              | Pituitary                    | 0.938                                                 | <b>9.22</b>            | 0.893       | 0.457       | 0.562 | BLQ   | BLQ   | BLQ   |
|                              | Salivary gland               | 1.56                                                  | <b>10.7</b>            | 1.29        | 0.911       | 0.666 | 0.472 | 0.415 | 0.376 |
|                              | Thymus                       | 0.742                                                 | <b>2.30</b>            | 0.778       | 0.930       | 0.665 | 0.317 | 0.253 | 0.231 |
|                              | Thyroid                      | 1.20                                                  | <b>10.7</b>            | 1.29        | 3.82        | 1.02  | 0.491 | 0.531 | 0.349 |
| Reproductive                 | Bulbourethral gland          | 1.51                                                  | <b>10.4</b>            | 1.07        | 1.26        | 0.757 | 0.380 | 0.437 | BLQ   |
|                              | Epididymis                   | 0.668                                                 | <b>12.5</b>            | 7.40        | 3.84        | 0.971 | 0.294 | 0.302 | 0.267 |
|                              | Preputial gland              | 1.40                                                  | <b>24.6</b>            | 0.893       | 2.41        | 3.29  | 1.45  | 0.754 | 0.415 |
|                              | Prostate                     | 0.750                                                 | <b>5.42</b>            | 1.29        | 0.813       | 0.629 | 0.582 | 0.321 | 8.16  |
|                              | Seminal vesicles             | 0.279                                                 | <b>9.92</b>            | 0.714       | 1.89        | 1.06  | 0.463 | 0.323 | 0.488 |
|                              | Testis                       | 0.383                                                 | <b>4.67</b>            | 0.312       | 0.326       | 0.195 | 0.177 | 0.213 | 0.246 |
|                              | Musculo-skeletal             | Bone marrow                                           | 2.22                   | <b>9.07</b> | 3.70        | 2.08  | 2.93  | 0.784 | 1.49  |
| Bone surface <sup>b</sup>    |                              | 3.28                                                  | <b>4.03</b>            | 0.590       | 0.758       | 0.640 | 0.743 | 0.720 | 0.940 |
| Diaphragm                    |                              | 5.73                                                  | <b>11.5</b>            | 1.79        | 0.948       | 0.457 | 0.257 | 0.621 | BLQ   |
| Fat (abdominal) <sup>b</sup> |                              | 1.77                                                  | <b>11.1</b>            | 4.57        | 3.10        | 5.60  | 7.81  | 3.87  | 5.49  |
| Fat (brown)                  |                              | 8.52                                                  | 43.1                   | 41.3        | <b>84.0</b> | 11.9  | 10.6  | 3.75  | 3.03  |
| Fur                          |                              | 0.209                                                 | <b>0.791</b>           | 0.586       | 0.166       | 0.194 | 0.462 | 0.458 | 0.170 |
| Muscle (skeletal)            |                              | 0.931                                                 | <b>1.64</b>            | 0.356       | 0.291       | 0.307 | 0.211 | 0.233 | 0.202 |
| Skin                         |                              | 0.888                                                 | <b>3.37</b>            | 1.45        | 0.826       | 2.74  | 0.768 | 1.92  | 0.943 |
| Tongue                       |                              | 2.21                                                  | <b>9.06</b>            | 0.869       | 2.07        | 1.48  | 0.437 | 0.403 | 0.365 |
| Excretory                    | Caecum wall                  | <b>59.0</b>                                           | 21.4                   | 4.61        | 1.16        | 2.070 | 1.15  | 0.559 | 0.650 |
|                              | Large intestine wall         | 1.10                                                  | 4.22                   | <b>13.0</b> | 1.14        | 0.619 | 0.344 | 0.367 | 0.457 |
|                              | Oesophagus wall              | 9.12                                                  | <b>25.3</b>            | 1.66        | 3.47        | 0.781 | 0.257 | 0.488 | BLQ   |
|                              | Stomach wall (glandular)     | 9.49                                                  | <b>14.7</b>            | 1.50        | 0.894       | 0.771 | 0.654 | 0.268 | 0.347 |
|                              | Stomach wall (non-glandular) | 38.3                                                  | <b>555<sup>c</sup></b> | 19.6        | 7.04        | 1.35  | 0.827 | 0.361 | 0.189 |
|                              | Small intestine wall         | <b>80.6</b>                                           | 31.6                   | 2.73        | 2.97        | 3.57  | 1.76  | 0.304 | 0.715 |
|                              | Urinary bladder wall         | <b>38.5</b>                                           | 31.4                   | 10.6        | 4.59        | 6.01  | 3.48  | 2.78  | 2.43  |

Upper and lower limits of quantification = 528 and 0.120  $\mu\text{g equiv } 10\text{-NO}_2\text{-OA/g}$  of tissue, respectively

For plasma and blood cells the lower limit of quantification = 0.034 – 0.043  $\mu\text{g equiv } 10\text{-NO}_2\text{-OA/g}$

NS Tissue not sectioned

BLQ Tissue radioactivity concentration below the lower limit of quantification

<sup>a</sup> Determined by liquid scintillation analysis

<sup>b</sup> Tissue corrected for quenching

<sup>c</sup> Value should be treated as an estimate as above the upper limit of quantification

Values in bold represent maximum tissue concentrations ( $C_{\text{max}}$ )

**Supplemental Table S2.** Concentrations of radioactivity in rat tissues determined by QWBA after a single oral administration of 30mg/Kg 10-NO<sub>2</sub>-[<sup>14</sup>C]OA (labeled at carbon 10). N=1 for each time point.

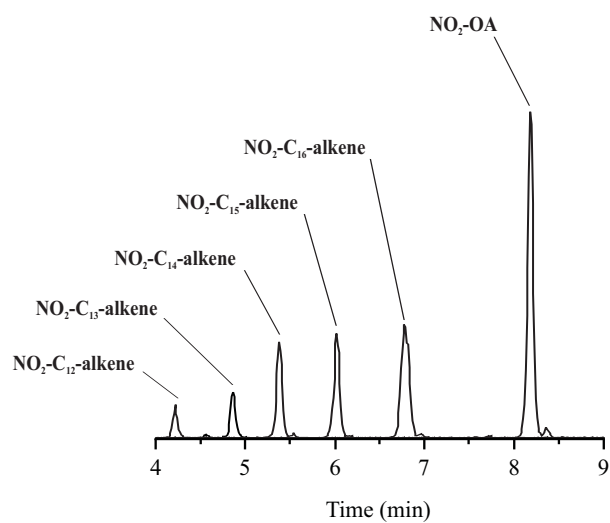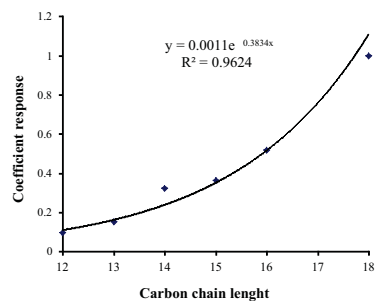

**Supplemental Fig. S1.** Chromatogram of nitro-alkene and nitro-alkane standards and normalization of the effect of nitro fatty acid chain lengths on the mass spectrometry response intensity.
